# Supplementary material
Source: publisher figshare collection journal article supplement (https://acs.figshare.com/ndownloader/files/4715296)
Supplement: Supplementary file 1 [file 4715296]

# Supporting Information

## Probing the Permeability of Polyelectrolyte Multilayer Capsules via a Molecular Beacon Approach

Alexandra S. Angelatos, Angus P. R. Johnston, Yajun Wang, and Frank Caruso\*

*Centre for Nanoscience and Nanotechnology, Department of Chemical and Biomolecular Engineering, The University of Melbourne, Parkville, Victoria 3010, Australia*

\* To whom correspondence should be addressed. E-mail: fcaruso@unimelb.edu.au

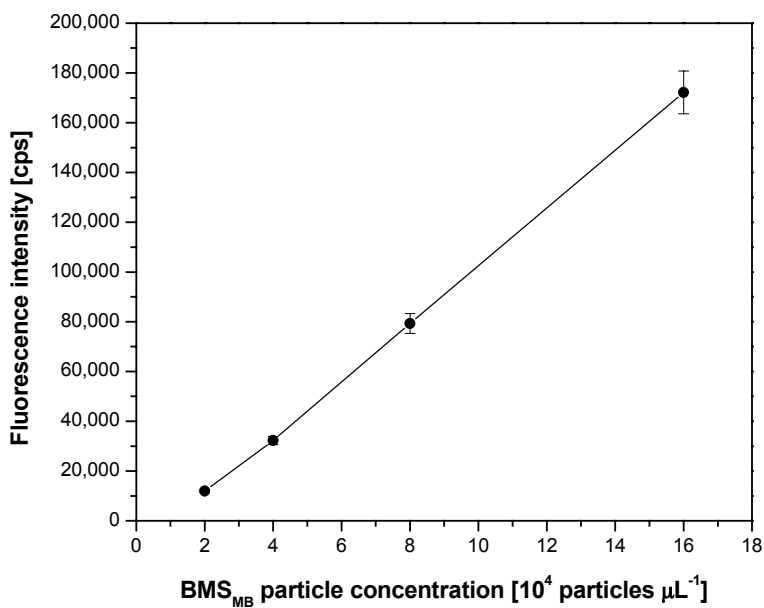

**Figure S1.** Variation in MB fluorescence with BMS<sub>MB</sub> particle concentration. Assay conditions: MB:BMS ratio, 1:1; DNA target concentration, 4  $\mu\text{M}$ ; DNA target size, 35 b; pH, 7; NaCl concentration, 0.5 M; incubation time, 48 h.

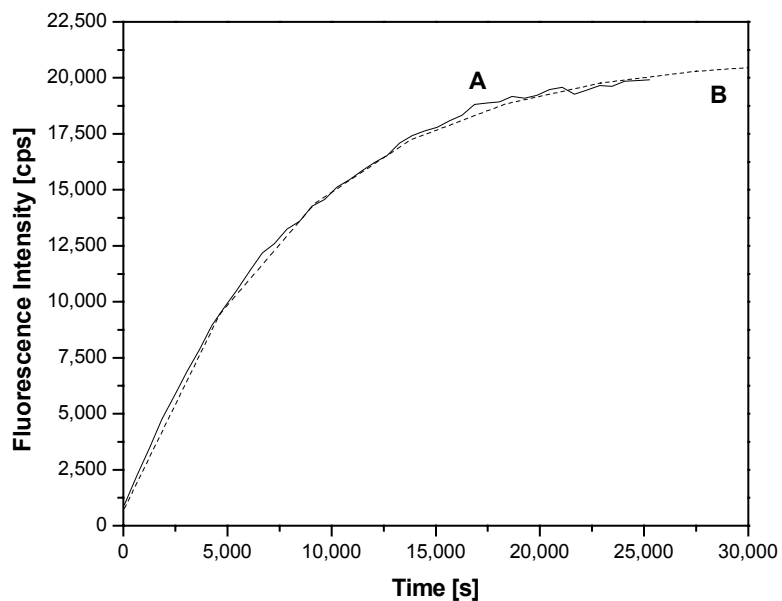

**Figure S2.** Variation in MB fluorescence with time for  $BMS_{MB}$  particles encapsulated within  $PSS/(PAH/PSS)_3$ : (A) experimental data; (B) curve fit by Equation 1. Assay conditions:  $BMS_{MB}$  particle concentration,  $6 \times 10^4$  particles  $\mu L^{-1}$ ; MB:BMS ratio, 1:1; DNA target concentration, 3  $\mu M$ ; DNA target size, 20 b; pH, 7; NaCl concentration, 0.5 M.
